# Supplementary material for: Cortical Surround Interactions and Perceptual Salience via Natural Scene Statistics
Source: PubMed Central journal article supplement (PMC3291533; doi:10.1371/journal.pcbi.1002405), 2012-03-01
Supplement: pcbi.1002405.s004.pdf [file pcbi.1002405.s004.pdf]

## TEXT S1: LINEAR FILTERS

Linear filters are derived from the first level of a steerable pyramid [1], extended to include complex analytic filters, that is, the real and imaginary parts correspond to a pair of even- and odd-symmetric filters [2]. The filters used in this transformation are polar-separable in the Fourier domain, where they may be written as:

$$L(r, \phi) = \begin{cases} 2 \cos(\frac{\pi}{2} \log_2 \frac{4r}{\pi}), & \frac{\pi}{4} < r < \frac{\pi}{2} \\ 2 & r \leq \frac{\pi}{4} \\ 0 & r \geq \frac{\pi}{2} \end{cases}$$

$$B_j(r, \phi) = H(r)G_j(\phi), \quad j \in [0, J - 1],$$

with radial and angular parts

$$H(r) = \begin{cases} \cos(\frac{\pi}{2} \log_2 \frac{2r}{\pi}), & \frac{\pi}{4} < r < \frac{\pi}{2} \\ 1 & r \geq \frac{\pi}{2} \\ 0 & r \leq \frac{\pi}{4} \end{cases}$$

$$G_j(\phi) = \begin{cases} \alpha_J \left[ \cos\left(\phi - \frac{\pi_j}{J}\right) \right]^{J-1}, & \left| \phi - \frac{\pi_j}{J} \right| < \frac{\pi}{2} \\ 0 & \text{otherwise,} \end{cases}$$

where  $J$  is the number of spatial scales indexed by  $j$ , an  $r, \phi$  are polar frequency coordinates, and  $\alpha_J = 2^{J-1} \frac{(J-1)!}{\sqrt{J[2(J-1)]!}}$ .

Two example filters are shown in fig. 1

### REFERENCES

- [1] E.P. Simoncelli, W.T. Freeman, E.H. Adelson, and D.J. Heeger. Shiftable multi-scale transforms. *IEEE Trans. Info. Theory*, 38:587–607, 1992.
- [2] J. Portilla and E. P. Simoncelli. A parametric texture model based on joint statistics of complexwavelet coefficients. *International Journal of Computer Vision*, 40(1):49–71, 2000.

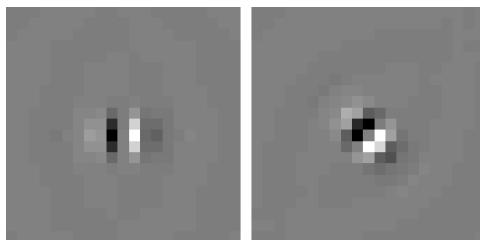

FIGURE 1. Two examples of the linear filters used in the simulations [1, 2].
