# Supplementary material for: Cortical Surround Interactions and Perceptual Salience via Natural Scene Statistics
Source: PLOS journal article supplement (doi:10.1371/journal.pcbi.1002405), 2012-03-01
Supplement: S7 (10.1371/journal.pcbi.1002405.s007) [file journal.pcbi.1002405.s007]

301 Moved Permanently

# Moved Permanently

The document has moved here.

---

Apache Server at www.ploscompbiol.org Port 80
